# Supplementary material
Source: MDPI journal article supplement (https://www.mdpi.com/2304-6740/4/4/35)

# checkCIF/PLATON report

You have not supplied any structure factors. As a result the full set of tests cannot be run.

THIS REPORT IS FOR GUIDANCE ONLY. IF USED AS PART OF A REVIEW PROCEDURE FOR PUBLICATION, IT SHOULD NOT REPLACE THE EXPERTISE OF AN EXPERIENCED CRYSTALLOGRAPHIC REFEREE.

No syntax errors found.      CIF dictionary      Interpreting this report

## Datablock: LCP-Cmcm-ST-DEG

---

Bond precision:    P- O = 0.0067 A                      Wavelength=0.70930

Cell:                      a=5.4347(4)              b=8.1638(5)              c=6.2135(4)  
                                alpha=90              beta=90              gamma=90  
Temperature:              298 K

|                | Calculated       | Reported      |
|----------------|------------------|---------------|
| Volume         | 275.68(3)        | 275.68(3)     |
| Space group    | C m c m          | C m c m       |
| Hall group     | -C 2c 2          | -C -2x;-2yc   |
| Moiety formula | Co2 O8 P2, 2(Li) | ?             |
| Sum formula    | Co2 Li2 O8 P2    | Co1 Li1 O4 P1 |
| Mr             | 321.68           | 160.80        |
| Dx,g cm-3      | 3.875            | 3.875         |
| Z              | 2                | 4             |
| Mu (mm-1)      | 6.528            | 6.358         |
| F000           | 308.0            | 112.0         |
| F000'          | 309.96           |               |
| h,k,lmax       | 7,11,8           |               |
| Nref           | 239              |               |
| Tmin,Tmax      |                  |               |
| Tmin'          |                  |               |

Correction method= Not given

Data completeness= 0.000                      Theta(max)=

R(reflections)= 0.0175( 0)                      wR2(reflections)= wR= 0.0206( 0)

S = 1.570                      Npar= 75

---

The following ALERTS were generated. Each ALERT has the format  
**test-name\_ALERT\_alert-type\_alert-level.**  
Click on the hyperlinks for more details of the test.

---

## ● Alert level C

ABSMU01\_ALERT\_1\_C The ratio of given/expected absorption coefficient lies  
outside the range 0.99 <> 1.01  
Calculated value of mu = 6.605  
Value of mu given = 6.358  
PLAT127\_ALERT\_1\_C Implicit Hall Symbol Inconsistent with Explicit -C -2x;-2yc;-2

---

## ● Alert level G

RADNT01\_ALERT\_1\_G Extra text has been found in the \_diffn\_radiation\_type field.  
Radiation given as Mo K\al  
Radiation identified as Mo K\al  
RADNW01\_ALERT\_1\_G The radiation wavelength given implies that Mo K $\alpha$  has  
been used. Please check that this is correct.  
Wavelength given = 0.70930  
PLAT004\_ALERT\_5\_G Polymeric Structure Found with Maximum Dimension 3 Info  
PLAT045\_ALERT\_1\_G Calculated and Reported Z Differ by a Factor ... 0.50 Check  
PLAT092\_ALERT\_4\_G Check: Wavelength given is not Cu,Ga,Mo,Ag,In Ka 0.70930 Ang.  
PLAT793\_ALERT\_4\_G The Model has Chirality at P1 (Centro SPGR) S Verify  
PLAT802\_ALERT\_4\_G CIF Input Record(s) with more than 80 Characters 1 Info  
PLAT984\_ALERT\_1\_G The P-f' = 0.104 Deviates from the B&C-Value 0.102 Check

---

- 0 **ALERT level A** = Most likely a serious problem - resolve or explain  
0 **ALERT level B** = A potentially serious problem, consider carefully  
2 **ALERT level C** = Check. Ensure it is not caused by an omission or oversight  
8 **ALERT level G** = General information/check it is not something unexpected
- 6 ALERT type 1 CIF construction/syntax error, inconsistent or missing data  
0 ALERT type 2 Indicator that the structure model may be wrong or deficient  
0 ALERT type 3 Indicator that the structure quality may be low  
3 ALERT type 4 Improvement, methodology, query or suggestion  
1 ALERT type 5 Informative message, check
- 

## Datablock: LCP-Cmcm-ST-TEG

---

Bond precision: P- O = 0.0103 A Wavelength=0.70930

Cell: a=5.4354(5) b=8.1680(7) c=6.2159(5)  
alpha=90 beta=90 gamma=90

Temperature: 298 K

|                | Calculated       | Reported      |
|----------------|------------------|---------------|
| Volume         | 275.96(4)        | 275.97(4)     |
| Space group    | C m c m          | C m c m       |
| Hall group     | -C 2c 2          | -C -2x;-2yc   |
| Moiety formula | Co2 O8 P2, 2(Li) | ?             |
| Sum formula    | Co2 Li2 O8 P2    | Co1 Li1 O4 P1 |
| Mr             | 321.68           | 160.80        |
| Dx,g cm-3      | 3.871            | 3.871         |
| Z              | 2                | 4             |
| Mu (mm-1)      | 6.521            | 6.565         |
| F000           | 308.0            | 112.0         |
| F000'          | 309.96           |               |
| h,k,lmax       | 7,11,8           |               |
| Nref           | 239              |               |
| Tmin,Tmax      |                  |               |
| Tmin'          |                  |               |

Correction method= Not given

Data completeness= 0.000

Theta(max)=

R(reflections)= 0.0243( 0)

wR2(reflections)= wR= 0.0278( 0)

S = 2.160

Npar= 75

The following ALERTS were generated. Each ALERT has the format

**test-name\_ALERT\_alert-type\_alert-level.**

Click on the hyperlinks for more details of the test.

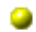

#### Alert level C

PLAT127\_ALERT\_1\_C Implicit Hall Symbol Inconsistent with Explicit -C -2x;-2yc;-2

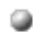

#### Alert level G

RADNT01\_ALERT\_1\_G Extra text has been found in the \_diffrn\_radiation\_type field.

Radiation given as Mo K\al

Radiation identified as Mo K\alpha

RADNW01\_ALERT\_1\_G The radiation wavelength given implies that Mo Kalpha has been used. Please check that this is correct.

Wavelength given = 0.70930

|                   |                                                  |         |        |
|-------------------|--------------------------------------------------|---------|--------|
| PLAT004_ALERT_5_G | Polymeric Structure Found with Maximum Dimension | 3       | Info   |
| PLAT045_ALERT_1_G | Calculated and Reported Z Differ by a Factor ... | 0.50    | Check  |
| PLAT092_ALERT_4_G | Check: Wavelength given is not Cu,Ga,Mo,Ag,In Ka | 0.70930 | Ang.   |
| PLAT793_ALERT_4_G | The Model has Chirality at P1 (Centro SPGR)      | S       | Verify |
| PLAT802_ALERT_4_G | CIF Input Record(s) with more than 80 Characters | 1       | Info   |
| PLAT984_ALERT_1_G | The P-f' = 0.104 Deviates from the B&C-Value     | 0.102   | Check  |

0 **ALERT level A** = Most likely a serious problem - resolve or explain

0 **ALERT level B** = A potentially serious problem, consider carefully

1 **ALERT level C** = Check. Ensure it is not caused by an omission or oversight

8 **ALERT level G** = General information/check it is not something unexpected

5 ALERT type 1 CIF construction/syntax error, inconsistent or missing data  
0 ALERT type 2 Indicator that the structure model may be wrong or deficient  
0 ALERT type 3 Indicator that the structure quality may be low  
3 ALERT type 4 Improvement, methodology, query or suggestion  
1 ALERT type 5 Informative message, check

---

## Datablock: LCP-Cmcm\_ST-TTEG

---

Bond precision: P- O = 0.0080 A                      Wavelength=0.70930

Cell:                      a=5.4341(4)                      b=8.1676(5)                      c=6.2176(4)  
                                alpha=90                      beta=90                      gamma=90

Temperature:                      298 K

|                | Calculated       | Reported      |
|----------------|------------------|---------------|
| Volume         | 275.96(3)        | 275.96(3)     |
| Space group    | C m c m          | C m c m       |
| Hall group     | -C 2c 2          | -C -2x;-2yc   |
| Moiety formula | Co2 O8 P2, 2(Li) | ?             |
| Sum formula    | Co2 Li2 O8 P2    | Co1 Li1 O4 P1 |
| Mr             | 321.68           | 160.80        |
| Dx,g cm-3      | 3.871            | 3.871         |
| Z              | 2                | 4             |
| Mu (mm-1)      | 6.521            | 6.565         |
| F000           | 308.0            | 112.0         |
| F000'          | 309.96           |               |
| h,k,lmax       | 7,11,8           |               |
| Nref           | 239              |               |
| Tmin,Tmax      |                  |               |
| Tmin'          |                  |               |

Correction method= Not given

Data completeness= 0.000                      Theta(max)=

R(reflections)= 0.0268( 0)                      wR2(reflections)= wR= 0.0311( 0)

S = 1.570                      Npar= 75

---

The following ALERTS were generated. Each ALERT has the format  
**test-name\_ALERT\_alert-type\_alert-level**.  
Click on the hyperlinks for more details of the test.

---

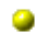

### Alert level C

PLAT127\_ALERT\_1\_C Implicit Hall Symbol Inconsistent with Explicit                      -C -2x;-2yc;-2

---

## ● Alert level G

RADNT01\_ALERT\_1\_G Extra text has been found in the \_diffrn\_radiation\_type field.

Radiation given as Mo K\al

Radiation identified as Mo K\al

RADNW01\_ALERT\_1\_G The radiation wavelength given implies that Mo K $\alpha$  has been used. Please check that this is correct.

Wavelength given = 0.70930

|                   |                                                  |         |          |
|-------------------|--------------------------------------------------|---------|----------|
| PLAT004_ALERT_5_G | Polymeric Structure Found with Maximum Dimension | 3       | Info     |
| PLAT045_ALERT_1_G | Calculated and Reported Z Differ by a Factor ... | 0.50    | Check    |
| PLAT092_ALERT_4_G | Check: Wavelength given is not Cu,Ga,Mo,Ag,In Ka | 0.70930 | Ang.     |
| PLAT793_ALERT_4_G | The Model has Chirality at P1 (Centro SPGR)      |         | S Verify |
| PLAT802_ALERT_4_G | CIF Input Record(s) with more than 80 Characters | 1       | Info     |
| PLAT984_ALERT_1_G | The P-f' = 0.104 Deviates from the B&C-Value     | 0.102   | Check    |

---

0 **ALERT level A** = Most likely a serious problem - resolve or explain  
0 **ALERT level B** = A potentially serious problem, consider carefully  
1 **ALERT level C** = Check. Ensure it is not caused by an omission or oversight  
8 **ALERT level G** = General information/check it is not something unexpected

5 ALERT type 1 CIF construction/syntax error, inconsistent or missing data  
0 ALERT type 2 Indicator that the structure model may be wrong or deficient  
0 ALERT type 3 Indicator that the structure quality may be low  
3 ALERT type 4 Improvement, methodology, query or suggestion  
1 ALERT type 5 Informative message, check

---

## Datablock: LCP-Cmcm-PO

---

Bond precision: P- O = 0.0040 A Wavelength=0.70930

Cell: a=5.4433(3) b=8.1694(4) c=6.2129(3)

alpha=90 beta=90 gamma=90

Temperature: 298 K

|                | Calculated       | Reported      |
|----------------|------------------|---------------|
| Volume         | 276.28(2)        | 276.28(2)     |
| Space group    | C m c m          | C m c m       |
| Hall group     | -C 2c 2          | -C -2x;-2yc   |
| Moiety formula | Co2 O8 P2, 2(Li) | ?             |
| Sum formula    | Co2 Li2 O8 P2    | Co1 Li1 O4 P1 |
| Mr             | 321.68           | 160.80        |
| Dx,g cm-3      | 3.867            | 3.866         |
| Z              | 2                | 4             |
| Mu (mm-1)      | 6.513            | 6.557         |
| F000           | 308.0            | 308.0         |
| F000'          | 309.96           |               |
| h,k,lmax       | 7,11,8           |               |
| Nref           | 240              |               |
| Tmin,Tmax      |                  |               |
| Tmin'          |                  |               |

Correction method= Not given

Data completeness= 0.000

Theta(max)=

R(reflections)= 0.0128( 0)

wR2(reflections)= wR= 0.0153( 0)

S = 1.080

Npar= 55

---

The following ALERTS were generated. Each ALERT has the format

**test-name\_ALERT\_alert-type\_alert-level.**

Click on the hyperlinks for more details of the test.

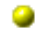

#### Alert level C

PLAT127\_ALERT\_1\_C Implicit Hall Symbol Inconsistent with Explicit -C -2x;-2yc;-2

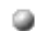

#### Alert level G

RADNT01\_ALERT\_1\_G Extra text has been found in the \_diffrn\_radiation\_type field.

Radiation given as Mo K\al

Radiation identified as Mo K\alpha

RADNW01\_ALERT\_1\_G The radiation wavelength given implies that Mo Kalpha has been used. Please check that this is correct.

Wavelength given = 0.70930

PLAT004\_ALERT\_5\_G Polymeric Structure Found with Maximum Dimension 3 Info

PLAT045\_ALERT\_1\_G Calculated and Reported Z Differ by a Factor ... 0.50 Check

PLAT092\_ALERT\_4\_G Check: Wavelength given is not Cu,Ga,Mo,Ag,In Ka 0.70930 Ang.

PLAT793\_ALERT\_4\_G The Model has Chirality at P1 (Centro SPGR) S Verify

PLAT802\_ALERT\_4\_G CIF Input Record(s) with more than 80 Characters 1 Info

PLAT984\_ALERT\_1\_G The P-f' = 0.104 Deviates from the B&C-Value 0.102 Check

---

0 **ALERT level A** = Most likely a serious problem - resolve or explain

0 **ALERT level B** = A potentially serious problem, consider carefully

1 **ALERT level C** = Check. Ensure it is not caused by an omission or oversight

8 **ALERT level G** = General information/check it is not something unexpected

5 ALERT type 1 CIF construction/syntax error, inconsistent or missing data

0 ALERT type 2 Indicator that the structure model may be wrong or deficient

0 ALERT type 3 Indicator that the structure quality may be low

3 ALERT type 4 Improvement, methodology, query or suggestion

1 ALERT type 5 Informative message, check

---

It is advisable to attempt to resolve as many as possible of the alerts in all categories. Often the minor alerts point to easily fixed oversights, errors and omissions in your CIF or refinement strategy, so attention to these fine details can be worthwhile. In order to resolve some of the more serious problems it may be necessary to carry out additional measurements or structure refinements. However, the purpose of your study may justify the reported deviations and the more serious of these should normally be commented upon in the discussion or experimental section of a paper or in the "special\_details" fields of the CIF. checkCIF was carefully designed to identify outliers and unusual parameters, but every test has its limitations and alerts that are not important in a particular case may appear. Conversely, the absence of alerts does not guarantee there are no aspects of the results needing attention. It is up to the individual to critically assess their own results and, if necessary, seek expert advice.

### **Publication of your CIF in IUCr journals**

A basic structural check has been run on your CIF. These basic checks will be run on all CIFs submitted for publication in IUCr journals (*Acta Crystallographica*, *Journal of Applied Crystallography*, *Journal of Synchrotron Radiation*); however, if you intend to submit to *Acta Crystallographica Section C* or *E* or *IUCrData*, you should make sure that full publication checks are run on the final version of your CIF prior to submission.

### **Publication of your CIF in other journals**

Please refer to the *Notes for Authors* of the relevant journal for any special instructions relating to CIF submission.

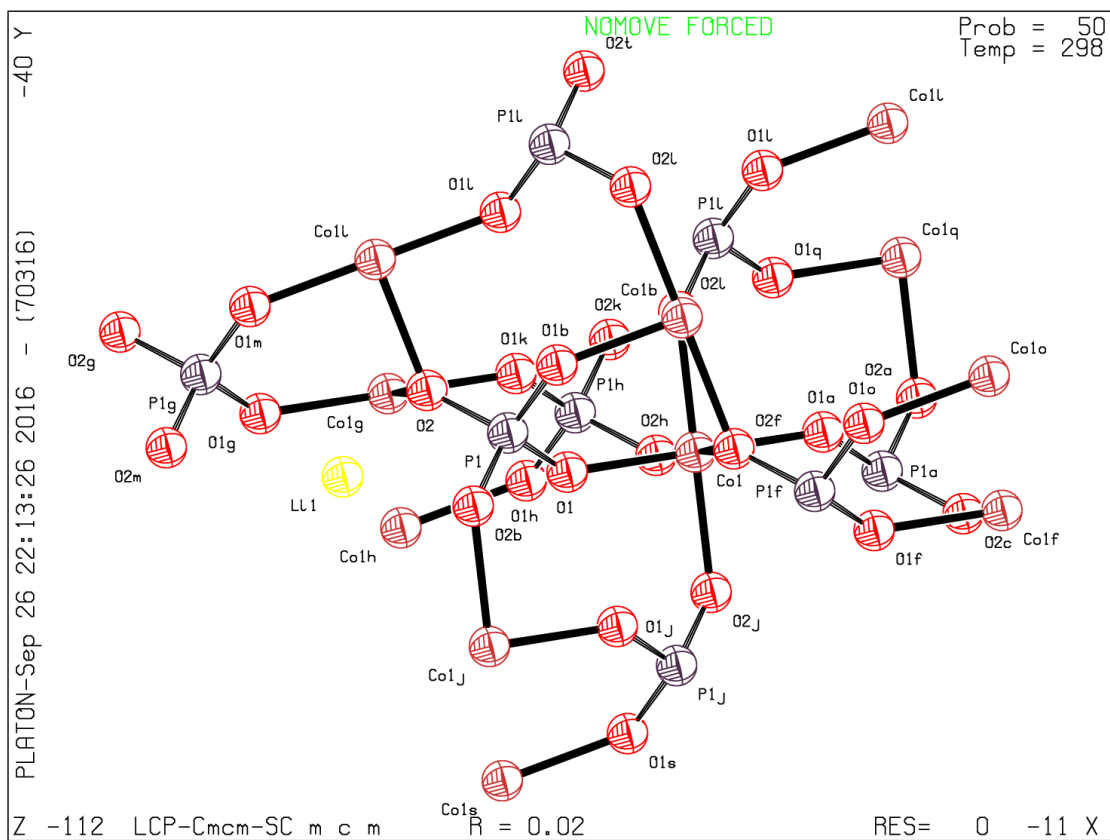



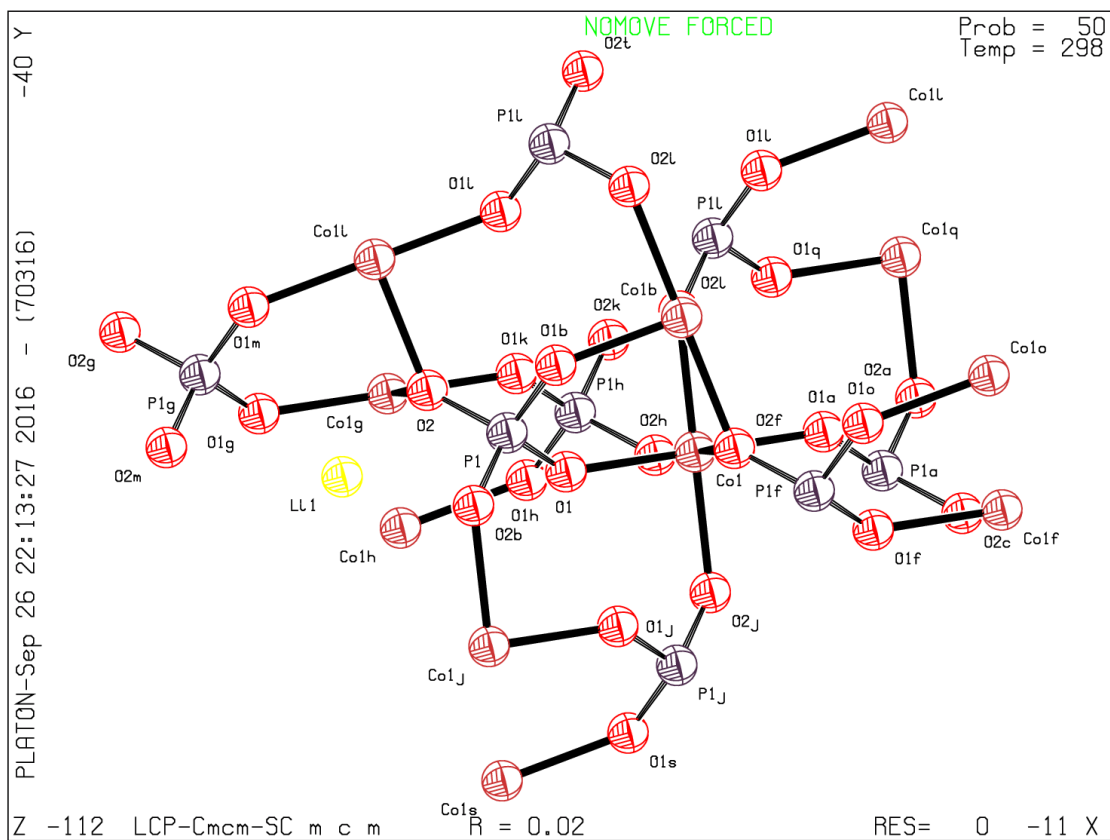

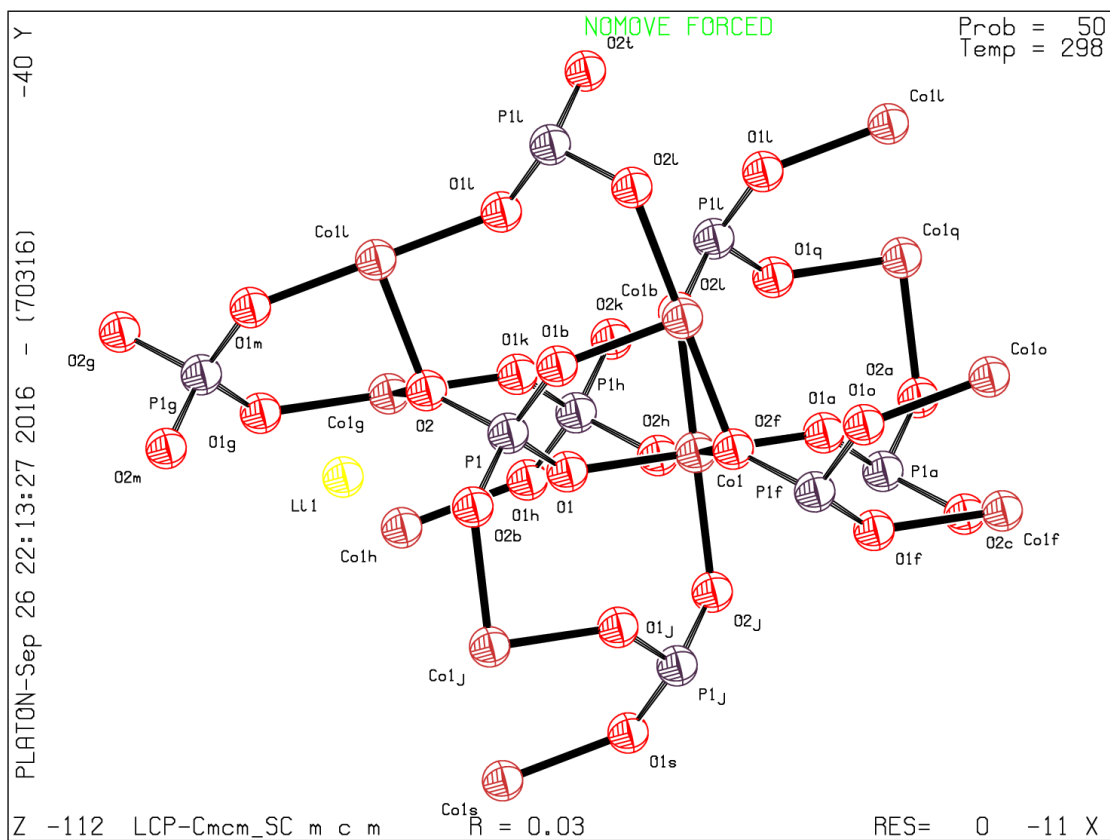

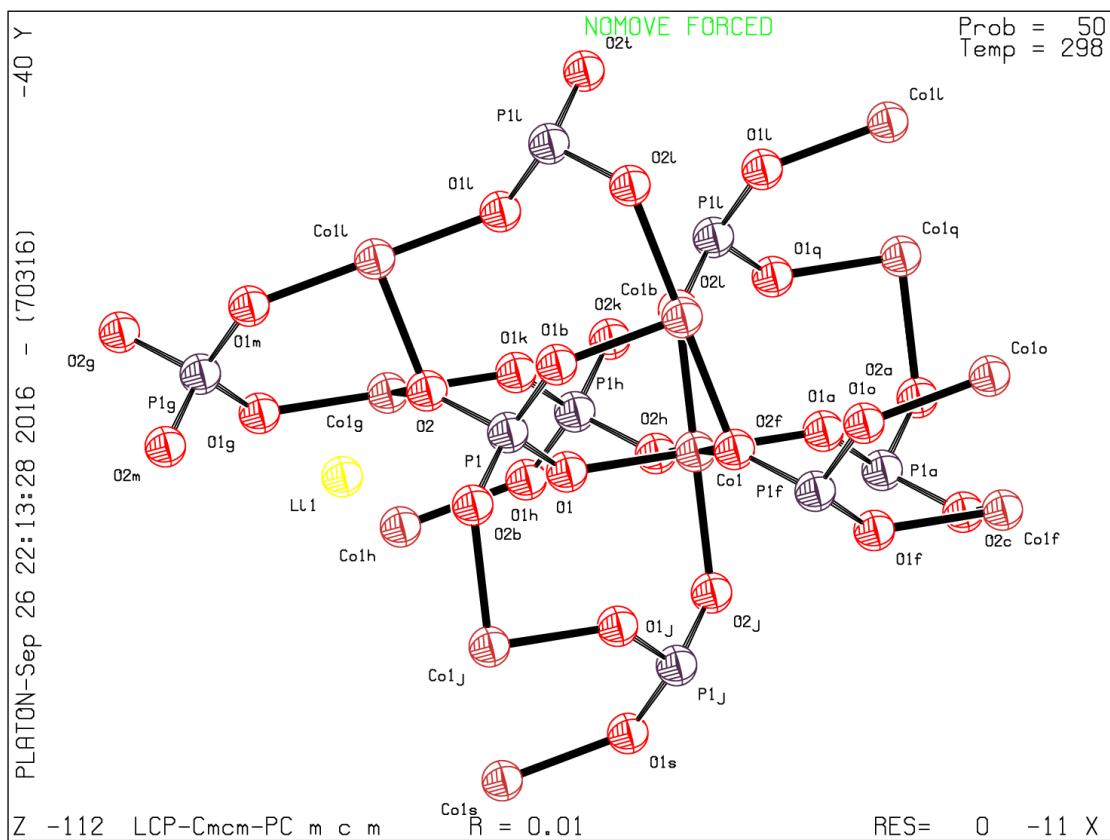

Supplement: s1 [file s1]
