# Supplementary material
Source: MDPI journal article supplement (https://www.mdpi.com/2304-6740/4/4/35)
Supplement: s1 [file s1]

Archive with 7 entries (6 files):
- inorganics-04-00035-supplementary files/
- inorganics-04-00035-supplementary files/checkcif_LCP_Cmcm_ST_DEG_TEG_TTEG_and_LCP_Cmcm_PO.pdf
- inorganics-04-00035-supplementary files/inorganics-04-00035-supplementary materials.pdf
- inorganics-04-00035-supplementary files/LiCoPO4_Cmcm_PO_TTEG_csd_432186.txt
- inorganics-04-00035-supplementary files/LiCoPO4_Cmcm_ST_DEG_CSD_432183.txt
- inorganics-04-00035-supplementary files/LiCoPO4_Cmcm_ST_TEG_CSD_432184.txt
- inorganics-04-00035-supplementary files/LiCoPO4_Cmcm_ST_TTEG_csd_432185.txt
